# Supplementary material for: Overexpression of a Fragaria vesca 1R-MYB Transcription Factor Gene (FvMYB114) Increases Salt and Cold Tolerance in Arabidopsis thaliana
Source: MDPI journal article supplement (doi:10.3390/ijms24065261), 2023-03-09
Supplement: s1 [file s1]

**Table S1.** List of primers used in this study.

| <b>Primer Name</b>   | <b>PrimerSequence (5'→3')</b>                 | <b>Purpose</b>                   |
|----------------------|-----------------------------------------------|----------------------------------|
| <i>AtSOS1</i> -F     | CTGCTTGCTACATTTCTGC                           | qPCR                             |
| <i>AtSOS1</i> -R     | TGCTTCCTCTCCTTCCTT                            | qPCR                             |
| <i>AtSOS3</i> -F     | GAATCCATCGCTCATCAA                            | qPCR                             |
| <i>AtSOS3</i> -R     | CCATTTCCTCCTCTTCACA                           | qPCR                             |
| <i>AtNHX1</i> -F     | AGCCTTCAGGGAACCACAAT                          | qPCR                             |
| <i>AtNHX1</i> -R     | CTCCAAAGACGGGTCGCATG                          | qPCR                             |
| <i>AtLEA3</i> -F     | GATTGACCCGGCTGAGCTACGA                        | qPCR                             |
| <i>AtLEA3</i> -R     | AGATGGGATTCACCACAAAAGA                        | qPCR                             |
| <i>AtCCA1</i> -F     | TTTGAGGCTTTATGGTAG                            | qPCR                             |
| <i>AtCCA1</i> -R     | TTTCTGAGCGTGACTTCT                            | qPCR                             |
| <i>AtCOR4</i> -F     | GAATCACCAGCGACGACA                            | qPCR                             |
| <i>AtCOR4</i> -R     | CCCCAAGAAATCAAACAA                            | qPCR                             |
| <i>AtCBF1</i> -F     | CCGACTTGTTGGATAATATGGCTGAAG                   | qPCR                             |
| <i>AtCBF1</i> -R     | TTAGTAACTCCAAAGCGACACGTCACC                   | qPCR                             |
| <i>AtCBF3</i> -F     | TTTACACGGCGGAACAGA                            | qPCR                             |
| <i>AtCBF3</i> -R     | CACTGTACGGACGGAAGC                            | qPCR                             |
| <i>FvActin</i> -F    | GCGACAATGGAACTGGAATGG                         | qPCR                             |
| <i>FvActin</i> -R    | GACAATTTCCCGTTCAGCAGTG                        | qPCR                             |
| <i>FvMYB114</i> -F   | ATGGAGGAGCAGACGGGT                            | full-length cDNA of FvMYB114     |
| <i>FvMYB114</i> -R   | CTATTCCGTATTATGCAAGATTTGTG                    | full-length cDNA of FvMYB114     |
| <i>HR</i> -F         | AGAACACGGGGGACGAGCTCATGGAGGAGCAGACGGGT        | PCR for homologous recombination |
| <i>HR</i> -R         | ACCATGGTGTCGACTCTAGACTATTCCGTATTATGCAAGATTTGT | PCR for homologous recombination |
| <i>FvMYB114</i> -qF  | GGAGGAGCAGACGGGTTT                            | qPCR                             |
| <i>FvMYB114</i> -qR  | TTGCCTAAGAGTTTGTGA                            | qPCR                             |
| <i>FvMYB114</i> -s1F | GTCGACATGGAGGAGCAGACGGGT                      | For subcellular localization     |
| <i>FvMYB114</i> -s1R | TTCCGTATTATGCAAGATTGTGGATCC                   | For subcellular localization     |

ATGGAGGAGCAGACGGGTTTGAGAAAGGGCGCATGGACGAGAGAAGAAGATAATATTTTG  
 M E E Q T G L R K G A W T R E E D N I L  
AGGCAGTGCCTCGCAAAGCATGGAGAAGGAAAATGGCACCAGATTCTGCAGCTGCAGGC  
 R Q C V A K H G E G K W H Q I P A A A G  
TTGAAAAGATGCAGGAAGAGCTGTAGGCTAAGGTGGCTGAATTATCTGAAACCGGATATA  
 L K R C R K S C R L R W L N Y L K P D I  
AAGAGAGGAGACTTTGAGGATGCTGAAGTAGATCTCATCATTAGGCTTCACAAACTCTTA  
 K R G D F E D A E V D L I I R L H K L L  
 GGCAACAGGCAAGCAGAAACTTTATACATATACGCACAAATCTTGCATAATACGGAATAG  
 G N R Q A E T L Y I Y A Q I L H N T E \*

300bp

**Figure S1.** Sequence of *FvMYB114*. The whole length of *FvMYB114* is 300bp, encoding 99aa. Underline means conserved DNA-binding domain of *FvMYB114*. \* means termination codon.

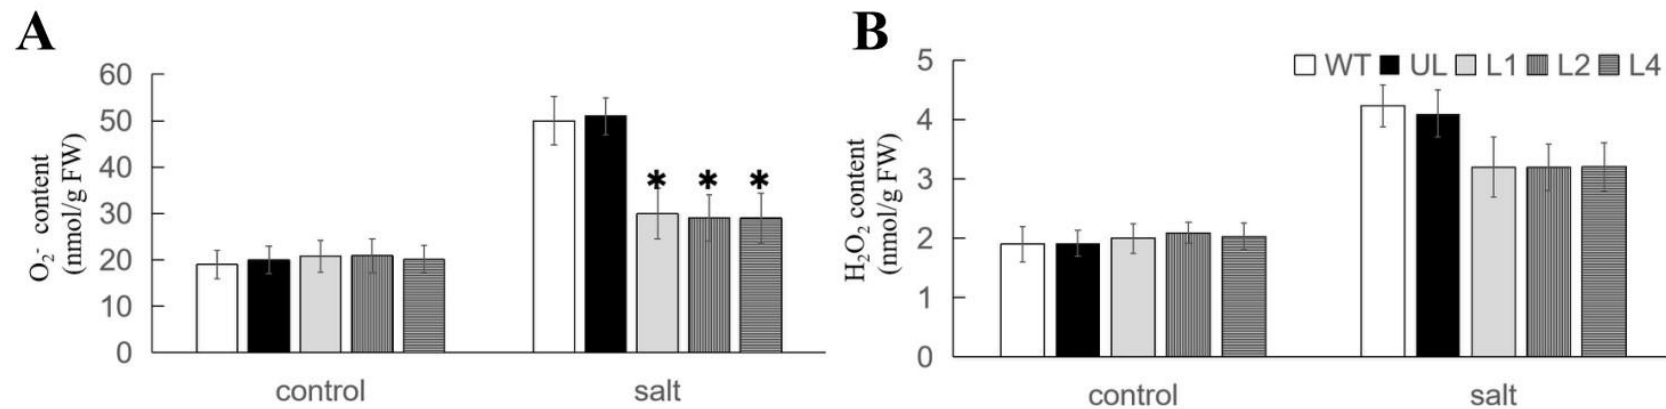

**Figure S2.** O<sub>2</sub><sup>-</sup> content and H<sub>2</sub>O<sub>2</sub> content were tested between WT, UL and transgenic *Arabidopsis* under salt treatment. (A) O<sub>2</sub><sup>-</sup> content of WT, UL, L1, L2 and L4 under control and salt condition; (B) H<sub>2</sub>O<sub>2</sub> content of WT, UL, L1, L2 and L4 under control and salt condition. \*  $P \leq 0.05$

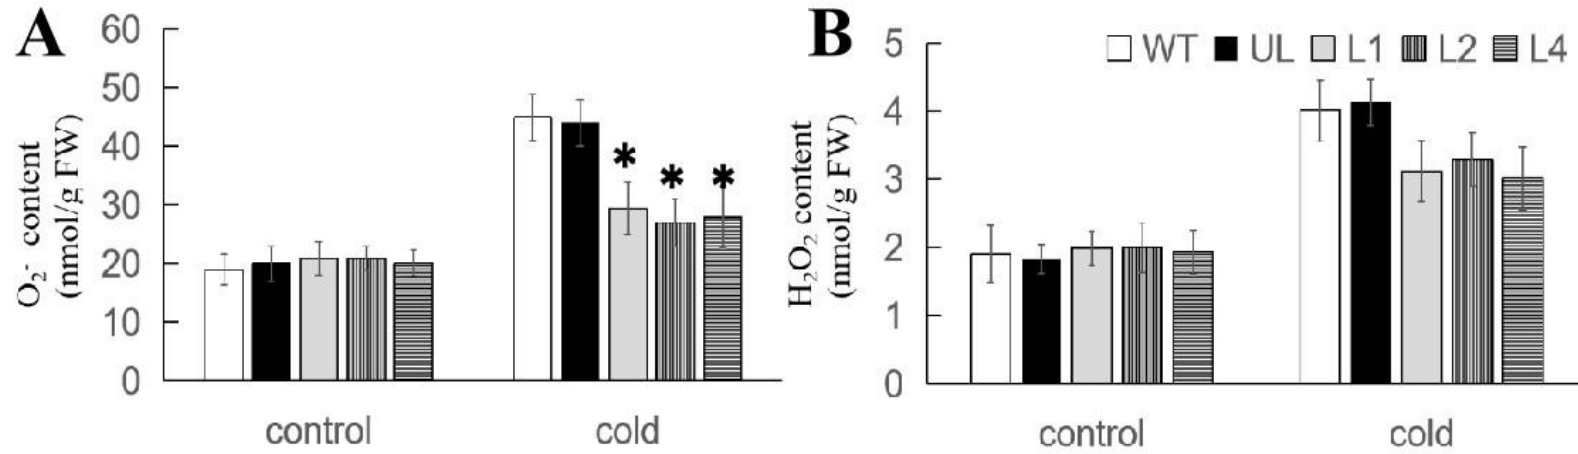

**Figure S3.**  $O_2^-$  content and  $H_2O_2$  content were tested between WT, UL and transgenic *Arabidopsis* under cold treatment. (A)  $O_2^-$  content of WT, UL, L1, L2 and L4 under control and cold condition; (B)  $H_2O_2$  content of WT, UL, L1, L2 and L4 under control and cold condition. \*  $P \leq 0.05$ .
